# Supplementary material for: Treatment of Gastrointestinal Disorders—Plants and Potential Mechanisms of Action of Their Constituents
Source: MDPI journal article supplement (doi:10.3390/molecules27092881), 2022-04-30
Supplement: s1 [file s1]

# Treatment of Gastrointestinal Disorders—Plants and Potential Mechanisms of Action of their Constituents

Szilvia Czige \*, Silvia Bittner Fialová, Jaroslav Tóth, Pavel Mučaji, Milan Nagy and on behalf of the OEMONOM †

Department of Pharmacognosy and Botany, Faculty of Pharmacy, Comenius University Bratislava, Odbojárov 10, SK-832 32 Bratislava, Slovakia; silvia.bittner.fialova@uniba.sk (S.B.F.); jaroslav.toth@uniba.sk (J.T.); mucaji@fpharm.uniba.sk (P.M.); nagy@fpharm.uniba.sk (M.N.)

\* Correspondence: szilvia.czige@uniba.sk; Tel.: +421250117209

† Listed at the end of Acknowledgments.

**Table S1.** Abbreviations.

| Abbreviations                                                                                                                  |
|--------------------------------------------------------------------------------------------------------------------------------|
| A2 receptor – adenosine 2 receptor                                                                                             |
| A7r5 cells – rat thoratic aorta smooth muscle cell line                                                                        |
| AGHR – acyl ghrelin                                                                                                            |
| AQPs1–9 – aquaporins 1–9                                                                                                       |
| ATC system – Anatomical Therapeutic Chemical Classification System                                                             |
| $\alpha_2$ -adrenergic receptor – alfa 2-adrenergic receptor                                                                   |
| $\beta_2$ -adrenergic receptor – beta 2-adrenergic receptor                                                                    |
| BK (= KCa1.1 = KCNMA1) channel – big potassium channel, calcium-activated potassium channel subfamily M alpha 1                |
| C57BL/6N – inbred strain of laboratory mouse                                                                                   |
| CA3–CA1 – CA1–CA4 regions of the cornu Ammonis (CA), hippocampus                                                               |
| Caco-2 cells – cell line derived from a colorectal adenocarcinoma patient                                                      |
| CALHM1 – calcium homeostasis modulator protein 1                                                                               |
| cAMP – cyclic adenosine monophosphate                                                                                          |
| CCK – cholecystokinin                                                                                                          |
| C-fibers – group C nerve fibers                                                                                                |
| CFTR – cystic fibrosis transmembrane conductance regulator protein                                                             |
| cGMP – cyclic guanosine monophosphate                                                                                          |
| ClC-2 – chloride channel 2                                                                                                     |
| CNS – central nervous system                                                                                                   |
| COX-1 – cyclooxygenase 1                                                                                                       |
| CYP 450 – cytochrome P450                                                                                                      |
| D <sub>1</sub> , D <sub>2</sub> , D <sub>3</sub> receptor – dopamine receptor D <sub>1</sub> , D <sub>2</sub> , D <sub>3</sub> |
| DBGI – Disorders of Brain-Gut Interactions                                                                                     |
| DRG – dorsal root ganglion                                                                                                     |
| EMA – European Medicines Agency                                                                                                |
| ENaC – epithelial sodium channel                                                                                               |
| eNOS – endothelial nitric oxide synthase                                                                                       |
| ENS – enteric nervous system                                                                                                   |
| EP <sub>3</sub> receptor – prostaglandin EP <sub>3</sub> receptor                                                              |
| EU – European Union                                                                                                            |
| FC – functional constipation                                                                                                   |
| FDI – functional diarrhoea                                                                                                     |
| FDY – functional dyspepsia                                                                                                     |

FFAR2, FFAR3 – free fatty acid receptors 2 and 3  
 FGIDs – functional gastrointestinal disorders  
 FH – functional heartburn  
 FRT cells – Fischer rat thyroid epithelial cell line  
 G cells – gastrin cells  
 GAS – gastrin  
 GHR – ghrelin  
 GI – gastrointestinal  
 GIT – gastrointestinal tract  
 GLP-1 – glucagon-like peptide-1  
 GPR40 receptor – G protein-coupled receptor 40  
 H<sub>1</sub>, H<sub>2</sub> receptors – histamine receptors H<sub>1</sub>, H<sub>2</sub>  
 HEK293, HEK tsA201 cells – human embryonic kidney cell line  
 HET-1A cells – normal oesophageal epithelium cell line  
 HGT-1 cells – human gastric cancer cell line  
 HMPC – Committee on Herbal Medicinal Products  
 5-HT – 5-hydroxytryptamine (serotonin)  
 hTRPV1 – human transient receptor potential channel (TRPV1)  
 HT-29 cells – human colorectal adenocarcinoma cell line  
 5-HT<sub>2C</sub>, 5-HT<sub>3</sub>, 5-HT<sub>3A</sub>, 5-HT<sub>4</sub> receptors  
 – 5-hydroxytryptamine (serotonin) receptors 5-HT<sub>2C</sub>, 5-HT<sub>3</sub>, 5-HT<sub>3A</sub>, 5-HT<sub>4</sub> subtypes  
 IC<sub>50</sub> (M) – inhibitory concentration 50% (molar concentration)  
 ICAM-1 – intercellular adhesion molecule 1  
 ICCs – interstitial cells of Cajal  
 ICR – Institute of Cancer Research  
 IFN- $\gamma$  – interferon gamma  
 IgA, IgG, IgM – immunoglobulins A, G, M  
 IL-1 $\beta$ , IL-2, IL-6, IL-8, IL-12 – interleukins 1 $\beta$ , 2, 6, 8, 12  
 iNOS – inducible nitric oxide synthase  
 IP<sub>3</sub> – inositol triphosphate  
 IP<sub>3</sub>R – inositol triphosphate receptor  
 K<sup>+</sup>-ATPase – ATP-sensitive potassium channel  
 K2P2.1 (KCNK2, TREK-1), K2P4.1 (KCNK4, TRAAK), K2P10.1 (KCNK10, TREK-2),  
 K2P18.1 (KCNK18, TWIK) – potassium channels (potassium channel subfamilies K  
 member 2, 4, 10, 18)  
 K<sub>ATP</sub> cascade – ATP-sensitive potassium channel cascade  
 KCNQ (KCNQ1, KCNQ2, KCNQ3) – potassium voltage-gated channels subfamily Q  
 member 1, 2, 3  
 KCNQ1/KCNE3 complex – complex of potassium voltage-gated channel subfamily Q  
 member 1 and potassium voltage-gated channel subfamily E regulatory subunit 3  
 Kv7 – voltage-gated potassium channels family Kv7  
 LCFA – long chain fatty acid  
 LOX-5 – lipoxygenase 5  
 LTB<sub>4</sub> – leukotriene 4  
 M<sub>1</sub>, M<sub>2</sub> and M<sub>3</sub> receptors (mAChRs) – muscarinic acetylcholine receptors M<sub>1</sub>, M<sub>2</sub> and M<sub>3</sub>  
 MOT – motilin  
 mRNA – messenger ribonucleic acid  
 nAChRs ( $\alpha$ 3 $\beta$ 4 nAChRs,  $\alpha$ 4 $\beta$ 2 nAChRs,  $\alpha$ 7 nAChRs) – nicotinic acetylcholine receptors  
 type  $\alpha$ 3 $\beta$ 4,  $\alpha$ 4 $\beta$ 2,  $\alpha$ 7  
 Nav1.2, Nav1.3, Nav1.5, Nav1.6, Nav1.7 channels – voltage-gated sodium channels 1.2,  
 1.3, 1.5, 1.6, 1.7

---

NF- $\kappa$ B – nuclear factor-kappa B  
NICE – The National Institute for Health and Care Excellence  
NK-1 receptor – neurokinin-1 receptor  
NVDs – nausea and vomiting disorders  
OATP – organic-anion-transporting polypeptide  
p-CREB – phosphorylated cAMP-responsive element-binding protein  
PGE<sub>2</sub> – prostaglandin E<sub>2</sub>  
P-gp – P-glycoprotein, permeability glycoprotein  
PIEZO2-type mechanoreceptor  
– piezo type mechanosensitive ion channel component 2  
PKA – cAMP-protein kinase A  
PLA2 – phospholipases A2  
PLC $\beta$ 2 – phospholipase C  $\beta$ 2  
PPAR (PPAR $\alpha$ , PPAR $\gamma$ ) – peroxisome proliferator-activated receptors  $\alpha$ ,  $\gamma$   
PPIs (H<sup>+</sup>/K<sup>+</sup>-ATPase inhibitors) – proton pump inhibitors  
PYY – peptide YY  
SCFA – short-chain fatty acid  
SSRI – selective serotonin reuptake inhibitor  
T84 cells – human colonic adenocarcinoma cell line  
TAS2R – bitter taste receptor  
T-cell – type of lymphocyte  
TG – trigeminal ganglion  
TMEM16A (ANO1) – transmembrane 16 (Anoctamin 1) protein mediates calcium-activated chloride channel (CaCC)  
TNF- $\alpha$  – tumour necrosis factor alpha  
TRP channels (superfamilies TRPA1, TRPC1, TRPC5, TRPM5, TRPM7, TRPM8, TRPV1)  
– transient receptor potential (TRP) channels  
TU – traditional use  
TXB<sub>2</sub> – thromboxane B<sub>2</sub>  
VGNC – voltage-gated sodium channel  
WEU – well established use

---

**Table S2.** List of constituents mentioned in the manuscript and their activities.

| Constituents             | Test     | Activities                                                           | References |
|--------------------------|----------|----------------------------------------------------------------------|------------|
| aloe-emodin              | in vivo  | CFTR channel activation                                              | [277]      |
|                          | ex vivo  | $\beta_2$ -adrenergic receptor inhibitor                             | [279]      |
| anethole                 | in vitro | TRPA1 activator                                                      | [174]      |
| anisaldehyde             | in vitro | TRPA1 activator                                                      | [173]      |
| anthraglycosides         | in vivo  | variable action on AQP <sub>s</sub> expression                       | [268–275]  |
| arylalkanones            | in vitro | anti-inflammatory activity                                           | [45]       |
|                          | in vivo  | anti-inflammatory activity                                           | [45]       |
|                          | human    | anti-inflammatory activity                                           | [45]       |
| biochanin A              | in vitro | increase of gastric acid production through PPAR $\gamma$ activation | [69]       |
| (-)- $\alpha$ -bisabolol | in vitro | TRPA1 activator                                                      | [167]      |
| boldine                  | in vitro | negative allosteric modulator of 5-HT <sub>3</sub> receptor          | [99]       |
|                          | in vivo  | mucus production increase                                            | [223]      |
| borneol                  | in vitro | TRPM8 agonist                                                        | [187]      |
| caffeine                 | in vitro | increase of gastric acid production through TAS2R                    | [64]       |
|                          | in vitro | increase of gastric acid production through A2 receptor antagonism   | [66]       |
| camphor                  | in vitro | TRPV1 biphasic agonist                                               | [137]      |
|                          | in vitro | TRPA1 activator                                                      | [176]      |
|                          | in vitro | TRPM8 agonist                                                        | [186]      |
| capsaicin                | human    | TRPV1 biphasic agonist                                               | [122]      |
| carnosic acid            | in vitro | TRPA1 activator                                                      | [178]      |
| carnosol                 | in vivo  | decrease in the gastric lesion index                                 | [18]       |
|                          | in vitro | TRPA1 activator                                                      | [178]      |
| carvacrol                | in vitro | TRPA1 activator                                                      | [165]      |
|                          | in vitro | TRPM7 inhibitor                                                      | [171]      |
|                          | in vitro | K2P2.1 activator                                                     | [199]      |
|                          | in vitro | Nav1.2, Nav1.3, Nav1.6, Nav1.7, and Nav1.8 inhibitor                 | [209]      |
| carvone                  | in vitro | TRPV1 biphasic agonist                                               | [137]      |
| catechin                 | in vitro | H <sup>+</sup> /K <sup>+</sup> -ATPase inhibitor                     | [21]       |
|                          | in vitro | CFTR channel inhibitor                                               | [234]      |
| 1,4-cineole              | in vitro | TRPA1 activator                                                      | [166]      |
|                          | in vitro | TRPM8 agonist                                                        | [166]      |
| 1,8-cineole              | in vitro | negative allosteric modulator of 5-HT <sub>3</sub> receptor          | [97]       |
|                          | in vitro | TRPV1 biphasic agonist                                               | [137]      |
|                          | in vitro | TRPM8 agonist                                                        | [166]      |
|                          | in vitro | ? Nav1.7 inhibitor                                                   | [210]      |
|                          | in vitro | TRPA1 agonist                                                        | [161]      |
| cinnamaldehyde           | in vitro | K2P2.1 activator                                                     | [199]      |
|                          | in vitro | TRPV1 biphasic agonist                                               | [137]      |

|                                                       |          |                                                                                      |           |
|-------------------------------------------------------|----------|--------------------------------------------------------------------------------------|-----------|
|                                                       | in vitro | TRPA1 activator                                                                      | [175]     |
| citronellal                                           | in vivo  | inhibitor of $\alpha 3\beta 4$ nAChR                                                 | [82]      |
|                                                       | in vitro | TRPV1 biphasic agonist                                                               | [137]     |
| citronellol                                           | in vitro | negative allosteric modulator of 5-HT <sub>3</sub> receptor                          | [97]      |
|                                                       | in vitro | K2P2.1 activator                                                                     | [199]     |
| <i>p</i> -cumenol                                     | in vitro | K2P2.1 activator                                                                     | [199]     |
| curcumin                                              | in vivo  | TRPV1 antagonist                                                                     | [142]     |
|                                                       | ex vivo  | TRPV1 antagonist                                                                     | [142]     |
|                                                       | in vitro | TRPM8 inactive (human)                                                               | [188]     |
|                                                       | in vitro | TRPM8 antagonist (rat)                                                               | [163]     |
|                                                       | in vitro | KCa1.1 activator                                                                     | [202]     |
|                                                       | in vivo  | $\alpha 2$ -adrenergic receptor antagonist                                           | [220]     |
| cyanidin                                              | in vitro | H <sup>+</sup> /K <sup>+</sup> -ATPase inhibitor                                     | [22]      |
| <i>p</i> -cymene                                      | in vitro | K2P2.1 activator                                                                     | [199]     |
| cynaropicrin                                          | ex vivo  | competitive antagonist of AChR                                                       | [84]      |
| delphinidin                                           | in vitro | H <sup>+</sup> /K <sup>+</sup> -ATPase inhibitor                                     | [22]      |
| 4,5-dicaffeoylquinic acid                             | in vitro | TRPV1 biphasic agonist                                                               | [137]     |
| <i>di</i> -1,6- <i>O</i> -galloyl- $\beta$ -D-glucose | in vitro | TMEM16A inhibitor                                                                    | [232]     |
| ellagic acid                                          | in vitro | PPAR $\gamma$ activator                                                              | [238]     |
| emodin                                                | in vivo  | histamine release from mast cells (H <sub>1</sub> receptor, H <sub>2</sub> receptor) | [264–266] |
|                                                       | ex vivo  | $\beta 2$ -adrenergic receptor inhibitor                                             | [279]     |
| (–)-epicatechin                                       | in vitro | H <sup>+</sup> /K <sup>+</sup> -ATPase inhibitor                                     | [21]      |
|                                                       | in vitro | CFTR channel inhibitor                                                               | [234]     |
| (–)-epicatechin gallate                               | in vitro | H <sup>+</sup> /K <sup>+</sup> -ATPase inhibitor                                     | [21]      |
|                                                       | in vitro | TMEM16A inhibitor                                                                    | [232]     |
| (–)-epigallocatechin                                  | in vitro | H <sup>+</sup> /K <sup>+</sup> -ATPase inhibitor                                     | [21]      |
| (–)-epigallocatechin gallate                          | in vitro | TMEM16A inhibitor                                                                    | [232]     |
| eriodictyol                                           | in vitro | H <sup>+</sup> /K <sup>+</sup> -ATPase inhibitor                                     | [22]      |
|                                                       | in vitro | TRPV1 antagonist                                                                     | [137]     |
| essential oils                                        | in vitro | anti-inflammatory activity                                                           | [45]      |
|                                                       | in vivo  | anti-inflammatory activity                                                           | [45]      |
|                                                       | human    | anti-inflammatory activity                                                           | [45]      |
| eugenol                                               | in vivo  | inhibitor of $\alpha 3\beta 4$ nAChR                                                 | [82]      |
|                                                       | in vitro | negative allosteric modulator of 5-HT <sub>3</sub> receptor                          | [97]      |
|                                                       | in vitro | TRPV1 biphasic agonist                                                               | [137]     |
|                                                       | in vitro | TRPA1 activator                                                                      | [168]     |
|                                                       | in vitro | TRPM8 agonist                                                                        | [161]     |
|                                                       | in vitro | K2P2.1 activator                                                                     | [199]     |
|                                                       | in vitro | Nav1.5 inhibitor                                                                     | [212]     |
|                                                       | ex vivo  | TMEM16A inhibitor                                                                    | [230,231] |
|                                                       | in vitro | anti-inflammatory activity                                                           | [45]      |
| flavonoids                                            | in vivo  | anti-inflammatory activity                                                           | [45]      |

|                        |          |                                                                      |           |
|------------------------|----------|----------------------------------------------------------------------|-----------|
|                        | human    | anti-inflammatory activity                                           | [45]      |
| galanolactone          | in vitro | antagonist of 5-HT <sub>3A</sub> receptor                            | [101]     |
|                        | in vivo  | antagonist of 5-HT <sub>3A</sub> receptor                            | [102–104] |
|                        | human    | antagonist of 5-HT <sub>3A</sub> receptor                            | [105–107] |
| gallic acid            | in vitro | increase of gastric acid production                                  | [65]      |
| genistein              | in vitro | increase of gastric acid production through PPAR $\gamma$ activation | [70]      |
| gentiopicroside        | human    | w/o increase in plasma level of PYY                                  | [37]      |
|                        | ex vivo  | L-type calcium channel inhibitor                                     | [93]      |
| geranial               | in vitro | TRPV1 biphasic agonist                                               | [137]     |
| geraniol               | in vitro | TRPM8 agonist                                                        | [185]     |
|                        | in vitro | K2P2.1 activator                                                     | [199]     |
| geranyl acetate        | in vitro | TRPA1 activator                                                      | [172]     |
| gingerol (unspecified) | in vivo  | 5-HT production decrease                                             | [107]     |
|                        | in vivo  | 5-HT receptor expression decrease                                    | [107]     |
|                        | in vivo  | NK-1 receptor expression decrease                                    | [301]     |
|                        | in vivo  | substance P production decrease                                      | [301]     |
|                        | in vivo  | dopamine production decrease                                         | [301]     |
|                        | in vivo  | D <sub>2</sub> receptor expression decrease                          | [301]     |
|                        | in vitro | antagonist of 5-HT <sub>3A</sub> receptor                            | [101]     |
| 6-gingerol             | in vivo  | antagonist of 5-HT <sub>3A</sub> receptor                            | [102–104] |
|                        | human    | antagonist of 5-HT <sub>3A</sub> receptor                            | [105–107] |
|                        | in vitro | TRPV1 biphasic agonist                                               | [133]     |
|                        | in vitro | TRPA1 activator                                                      | [169]     |
|                        | in vitro | TRPC5 inhibitor                                                      | [169]     |
|                        | in vitro | Nav1.8 inhibitor                                                     | [206]     |
|                        | ex vivo  | M <sub>3</sub> receptor antagonist                                   | [298]     |
|                        | in vitro | antagonist of 5-HT <sub>3A</sub> receptor                            | [101]     |
|                        | in vivo  | antagonist of 5-HT <sub>3A</sub> receptor                            | [102–104] |
|                        | human    | antagonist of 5-HT <sub>3A</sub> receptor                            | [105–107] |
| 8-gingerol             | ex vivo  | M <sub>3</sub> receptor antagonist                                   | [298]     |
|                        | in vivo  | L-type calcium channel inhibitor                                     | [304]     |
|                        | in vitro | antagonist of 5-HT <sub>3A</sub> receptor                            | [101]     |
|                        | in vivo  | antagonist of 5-HT <sub>3A</sub> receptor                            | [102–104] |
|                        | human    | antagonist of 5-HT <sub>3A</sub> receptor                            | [105–107] |
| 10-gingerol            | in vitro | antagonist of 5-HT <sub>3A</sub> receptor                            | [101]     |
|                        | in vivo  | antagonist of 5-HT <sub>3A</sub> receptor                            | [102–104] |
|                        | human    | antagonist of 5-HT <sub>3A</sub> receptor                            | [105–107] |
|                        | in vivo  | carboxylesterase inhibitor                                           | [111]     |
|                        | in vivo  | $\alpha_2$ -adrenergic receptor antagonist                           | [219]     |
|                        | in vivo  | M <sub>3</sub> receptor antagonist                                   | [298]     |
|                        | in vitro | competitive antagonist of 5-HT <sub>3A</sub> receptor                | [100]     |
| glabridin              | in vivo  | KCa1.1 activator                                                     | [201]     |
|                        | human    | butyrylcholinesterase inhibitor                                      | [111]     |
|                        | in vitro | TRPM8 antagonist                                                     | [171]     |

|                      |          |                                                                      |       |
|----------------------|----------|----------------------------------------------------------------------|-------|
|                      | in vivo  | $\alpha_2$ -adrenergic receptor antagonist                           | [219] |
| hesperidin           | in vivo  | antagonist of 5-HT <sub>2C</sub> receptor                            | [110] |
|                      | in vivo  | agonist of 5-HT <sub>4</sub> receptor                                | [112] |
|                      | in vivo  | mucus production increase                                            | [203] |
| hispidulin           | in vitro | TRPM8 antagonist                                                     | [171] |
| chlorogenic acid     | ex vivo  | competitive antagonist of AChR                                       | [87]  |
| chrysophanol         | ex vivo  | $\beta_2$ -adrenergic receptor inhibitor                             | [279] |
| iridoids (aglycones) | in vitro | anti-inflammatory activity                                           | [45]  |
|                      | in vivo  | anti-inflammatory activity                                           | [45]  |
|                      | human    | anti-inflammatory activity                                           | [45]  |
| isocohumulone        | in vitro | increase of gastric acid production through PPAR $\gamma$ activation | [67]  |
| isohumulone          | in vitro | increase of gastric acid production through PPAR $\gamma$ activation | [67]  |
| isoliquiritigenin    | in vivo  | L-type calcium channel inhibitor                                     | [92]  |
|                      | in vivo  | antagonist of 5-HT <sub>2C</sub> receptor                            | [110] |
|                      | in vivo  | TRPA1 activator                                                      | [171] |
|                      | in vitro | TRPC5 inhibitor                                                      | [195] |
|                      | in vitro | Nav1.7 inhibitor                                                     | [205] |
|                      | in vitro | Nav1.8 inhibitor                                                     | [206] |
| isopulegole          | in vitro | TRPM8 agonist                                                        | [185] |
| kaempferol           | in vitro | H <sup>+</sup> /K <sup>+</sup> -ATPase inhibitor                     | [22]  |
|                      | in vitro | TRPC5 inhibitor                                                      | [194] |
| LCFA                 | in vitro | GPR40 receptor activation                                            | [281] |
| licochalcone A       | in vitro | antagonist of 5-HT <sub>3A</sub> receptor                            | [100] |
|                      | in vitro | TRPM8 antagonist                                                     | [171] |
| linalool             | in vivo  | inhibitor of $\alpha_3\beta_4$ nAChR                                 | [82]  |
|                      | in vitro | negative allosteric modulator of 5-HT <sub>3</sub> receptor          | [98]  |
|                      | in vitro | TRPA1 activator                                                      | [177] |
|                      | in vitro | TRPM8 agonist                                                        | [185] |
| liquiritigenin       | in vitro | non-competitive antagonist of 5-HT <sub>3A</sub> receptor            | [100] |
|                      | in vitro | TMEM16A inhibitor                                                    | [217] |
| liquiritin           | in vitro | TRPV1 antagonist                                                     | [140] |
| loganic acid         | human    | w/o increase in plasma level of PYY                                  | [37]  |
| luteolin             | in vitro | H <sup>+</sup> /K <sup>+</sup> -ATPase inhibitor                     | [22]  |
|                      | in vitro | TMEM16A inhibitor                                                    | [233] |
| luteolin-7-glucoside | in vitro | H <sup>+</sup> /K <sup>+</sup> -ATPase inhibitor                     | [22]  |
| marrubenol           | ex vivo  | L-type calcium channels inhibitor                                    | [90]  |
| menthol              | in vitro | negative allosteric modulator of $\alpha_4\beta_2$ nAChR             | [78]  |
|                      | in vitro | competitive antagonist of $\alpha_7$ nAChR                           | [79]  |
|                      | ex vivo  | L-type calcium channel inhibitor                                     | [91]  |
|                      | in vitro | negative allosteric modulator of 5-HT <sub>3</sub> receptor          | [96]  |

|                                  |          |                                                                      |               |
|----------------------------------|----------|----------------------------------------------------------------------|---------------|
|                                  | in vitro | TRPV1 antagonist                                                     | [141]         |
|                                  | in vitro | TRPA1 activator                                                      | [164]         |
|                                  | in vivo  | TRPM8 agonist                                                        | [184]         |
|                                  | in vitro | K2P2.1 activator                                                     | [199]         |
|                                  | in vitro | Nav1.8 inhibitor                                                     | [207]         |
| menthone                         | in vitro | TRPM8 agonist                                                        | [166]         |
| myrcene                          | in vitro | TRPV1 biphasic agonist                                               | [137]         |
|                                  | in vitro | TRPA1 activator                                                      | [165]         |
| naringenin                       | in vitro | increase of gastric acid production through PPAR $\gamma$ activation | [69]          |
|                                  | in vitro | TRPV1 antagonist                                                     | [137]         |
| oleanolic acid                   | in vitro | TRPV1 biphasic antagonist                                            | [139]         |
| oleic acid                       | in vivo  | PGE <sub>2</sub>                                                     | [262]         |
|                                  | in vivo  | PPAR $\alpha$ or PPAR $\gamma$ activation                            | [284–286]     |
| 6-paradol                        | in vitro | TRPV1 biphasic agonist                                               | [134]         |
|                                  | in vitro | TRPA1 activator                                                      | [170]         |
| pelargonidin                     | in vitro | H <sup>+</sup> /K <sup>+</sup> -ATPase inhibitor                     | [22]          |
| polysaccharides (fermentable)    | in vivo  | SCFAs as FFAR2, and FFAR3 agonists                                   | [256–261]     |
|                                  | in vitro | SCFAs as CIC-2 activators                                            | [262]         |
| polysaccharides (non-digestible) | in vivo  | PIEZO2 activator                                                     | [253,254]     |
| procyanidin B2                   | in vitro | CFTR channel inhibitor                                               | [234]         |
| protopine                        | ex vivo  | competitive antagonist of AChR                                       | [83]          |
|                                  | in vitro | Nav1.5, and Nav1.7 inhibitor                                         | [211]         |
| quercetagenin                    | in vitro | H <sup>+</sup> /K <sup>+</sup> -ATPase inhibitor                     | [22]          |
| quercetin                        | in vitro | H <sup>+</sup> /K <sup>+</sup> -ATPase inhibitor                     | [22]          |
|                                  | ex vivo  | competitive antagonist of AChR                                       | [86]          |
|                                  | in vitro | TRPV1 antagonist                                                     | [137]         |
|                                  | in vitro | TRPM7 inhibitor                                                      | [191]         |
|                                  | in vitro | TRPC5 inhibitor                                                      | [194]         |
|                                  | in vitro | TMEM16A inhibitor                                                    | [233]         |
|                                  | in vitro | KCNQ1 modulator                                                      | [237]         |
| quercetin-3-galactoside          | in vitro | H <sup>+</sup> /K <sup>+</sup> -ATPase inhibitor                     | [22]          |
| quercetin-3-gluco-rhamnoside     | in vitro | H <sup>+</sup> /K <sup>+</sup> -ATPase inhibitor                     | [22]          |
| quercetin-3-glucoside            | in vitro | H <sup>+</sup> /K <sup>+</sup> -ATPase inhibitor                     | [22]          |
| quercetin-3-rhamnoside           | in vitro | H <sup>+</sup> /K <sup>+</sup> -ATPase inhibitor                     | [22]          |
| quinine (hydrochloride)          | human    | no CCK excretion                                                     | [34–36]       |
|                                  | human    | increase in plasma level of PYY                                      | [35]          |
|                                  | human    | various plasma level of GLP-1                                        | [33,35,40,41] |
| resveratrol                      | in vitro | increase of gastric acid production through PPAR $\gamma$ activation | [69]          |
| rhein                            | in vivo  | CFTR channel activation                                              | [276]         |



|                                                                                   |          |                                                   |           |
|-----------------------------------------------------------------------------------|----------|---------------------------------------------------|-----------|
| ricinoleic acid                                                                   | in vivo  | Na <sup>+</sup> /K <sup>+</sup> -ATPase inhibitor | [278]     |
|                                                                                   | ex vivo  | β <sub>2</sub> -adrenergic receptor inhibitor     | [279]     |
|                                                                                   | in vitro | Na <sup>+</sup> /K <sup>+</sup> -ATPase inhibitor | [287]     |
|                                                                                   | in vitro | active electrolytes absorption decrease           | [288]     |
|                                                                                   | in vivo  | intestinal mucosa impairment                      | [289]     |
|                                                                                   | ex vivo  | eNOS activation                                   | [277]     |
|                                                                                   | ex vivo  | chloride anion secretion                          | [291]     |
|                                                                                   | in vivo  | EP <sub>3</sub> agonist                           | [279]     |
| 6-shogaol                                                                         | in vivo  | ? PGE <sub>2</sub>                                | [279,280] |
|                                                                                   | in vitro | antagonist of 5-HT <sub>3A</sub> receptor         | [101]     |
|                                                                                   | in vivo  | antagonist of 5-HT <sub>3A</sub> receptor         | [102–104] |
|                                                                                   | human    | antagonist of 5-HT <sub>3A</sub> receptor         | [105–107] |
|                                                                                   | in vitro | TRPV1 biphasic agonist                            | [134]     |
|                                                                                   | in vitro | TRPA1 activator                                   | [169]     |
|                                                                                   | in vitro | TRPC5 inhibitor                                   | [169]     |
|                                                                                   | in vitro | Nav1.8                                            | [206]     |
|                                                                                   | in vivo  | α <sub>2</sub> -adrenergic receptor antagonist    | [219]     |
|                                                                                   | ex vivo  | M <sub>3</sub> receptor antagonist                | [298]     |
|                                                                                   | ex vivo  | ? TRPA1 activator                                 | [299]     |
|                                                                                   | in vivo  | α <sub>2</sub> -adrenergic receptor antagonist    | [219]     |
| 8-shogaol                                                                         | in vivo  | α <sub>2</sub> -adrenergic receptor antagonist    | [219]     |
| 10-shogaol                                                                        | ex vivo  | TRPA1 activator                                   | [134]     |
| sweroside                                                                         | human    | w/o increase in plasma level of PYY               | [37]      |
| swertiamarin                                                                      | human    | w/o increase in plasma level of PYY               | [37]      |
| tannic acid<br>( <i>penta</i> -1,2,3,4,6- <i>O</i> -galloyl-β- <i>D</i> -glucose) | ex vivo  | L-type calcium channel inhibitor                  | [94]      |
|                                                                                   | in vitro | H <sup>+</sup> /K <sup>+</sup> -ATPase inhibitor  | [23]      |
| taxifolin                                                                         | in vitro | TMEM16A inhibitor                                 | [232]     |
|                                                                                   | in vitro | CFTR channel inhibitor                            | [235]     |
|                                                                                   | in vitro | KCNQ1/KCNE3 inhibitor                             | [236]     |
|                                                                                   | in vitro | KCNQ2/3 activator                                 | [236]     |
|                                                                                   | in vitro | H <sup>+</sup> /K <sup>+</sup> -ATPase inhibitor  | [22]      |
| thymol                                                                            | in vitro | K2P2.1 activator                                  | [199]     |
| ursolic acid                                                                      | ex vivo  | competitive antagonist of AChR                    | [84]      |
|                                                                                   | in vitro | TRPV1 (biphasic) antagonist                       | [137,139] |
|                                                                                   | in vivo  | mucus production increase                         | [224]     |
| verbascoside                                                                      | in vitro | H <sup>+</sup> /K <sup>+</sup> -ATPase inhibitor  | [20]      |
|                                                                                   | in vitro | anti-inflammatory activity                        | [45]      |
|                                                                                   | in vivo  | anti-inflammatory activity                        | [45]      |
|                                                                                   | human    | anti-inflammatory activity                        | [45]      |
|                                                                                   | ex vivo  | competitive antagonist of AChR                    | [69]      |
| vitexin                                                                           | in vitro | TRPV1 antagonist                                  | [137]     |

|           |          |                                           |           |
|-----------|----------|-------------------------------------------|-----------|
| zingerone | in vitro | antagonist of 5-HT <sub>3A</sub> receptor | [101]     |
|           | in vivo  | antagonist of 5-HT <sub>3A</sub> receptor | [102–104] |
|           | human    | antagonist of 5-HT <sub>3A</sub> receptor | [105–107] |
|           | in vitro | TRPV1 biphasic agonist                    | [133]     |
|           | in vitro | TRPA1 activator                           | [169]     |
|           | in vitro | TRPC5 inhibitor                           | [169]     |

*Abbreviations:* A2 receptor – adenosine 2 receptor; AQP – aquaporins;  $\alpha_2$ -adrenergic receptor – alfa 2-adrenergic receptor;  $\beta_2$ -adrenergic receptor – beta 2-adrenergic receptor; BK (= KCa1.1 = KCNMA1) channel – big potassium channel, calcium-activated potassium channel subfamily M alpha 1; CCK – cholecystokinin; CFTR – cystic fibrosis transmembrane conductance regulator protein; CIC-2 – chloride channel 2; D<sub>2</sub> receptor – dopamine receptor D<sub>2</sub>; eNOS – endothelial nitric oxide synthase; EP<sub>3</sub> receptor – prostaglandin EP<sub>3</sub> receptor; FFAR2, FFAR3 – free fatty acid receptors 2 and 3; GLP-1 – glucagon-like peptide-1; GPR40 receptor – G protein-coupled receptor 40; 5-HT<sub>2C</sub>, 5-HT<sub>3</sub>, 5-HT<sub>3A</sub>, 5-HT<sub>4</sub> receptors – 5-hydroxytryptamine (serotonin) receptors 5-HT<sub>2C</sub>, 5-HT<sub>3</sub>, 5-HT<sub>3A</sub>, 5-HT<sub>4</sub> subtypes; K2P2.1 (KCNK2, TREK-1), – potassium channels (potassium channel subfamilies K member 2); KCNQ (KCNQ1, KCNQ2, KCNQ3) – potassium voltage-gated channels subfamily Q member 1, 2, 3; KCNQ1/KCNE3 complex – complex of potassium voltage-gated channel subfamily Q member 1 and potassium voltage-gated channel subfamily E regulatory subunit 3; LCFA – long chain fatty acid; M<sub>3</sub> receptor (mAChR) – muscarinic acetylcholine receptor M<sub>3</sub>; nAChRs ( $\alpha_3\beta_4$  nAChRs,  $\alpha_4\beta_2$  nAChRs,  $\alpha_7$  nAChRs) – nicotinic acetylcholine receptors type  $\alpha_3\beta_4$ ,  $\alpha_4\beta_2$ ,  $\alpha_7$ ; Nav1.2, Nav1.3, Nav1.5, Nav1.6, Nav1.7, Nav1.8 channels – voltage-gated sodium channels 1.2, 1.3, 1.5, 1.6, 1.7, 1.8; NK-1 – neurokinin-1 receptor; PGE<sub>2</sub> – prostaglandin E<sub>2</sub>; PIEZO2-type mechanoreceptor – piezo type mechanosensitive ion channel component 2; PPAR (PPAR $\alpha$ , PPAR $\gamma$ ) – peroxisome proliferator-activated receptors  $\alpha$ ,  $\gamma$ ; H<sup>+</sup>/K<sup>+</sup>-ATPase inhibitors (PPIs) – proton pump inhibitors; PYY – peptide YY; SCFA – short-chain fatty acid; TAS2R – bitter taste receptor; TMEM16A (ANO1) – transmembrane 16 (Anoctamin 1) protein mediates calcium-activated chloride channel (CaCC); TRP channels (superfamilies TRPA1, TRPC5, TRPM8, TRPV1) – transient receptor potential (TRP) channels.
